# Supplementary material for: Atherosclerosis severity is not affected by a deficiency in IL‐33/ST2 signaling
Source: PubMed Central journal article supplement (PMC4578523; doi:10.1002/iid3.62), 2015-05-10
Supplement: IID3-3-239-s001.pdf [file IID3-3-239-s001.pdf]

**Supporting Information Table 1: Body weight (g) before and after cholesterol-rich.**

Values represent the mean  $\pm$  SEM. \* $p < 0.001$ , significantly different before and after feeding 10 weeks a cholesterol-rich diet as analyzed by paired two-tailed Student's t-test. Not significantly different between groups before or after diet as analyzed by one-way ANOVA and Tukey's post-test for pairwise comparison.

|             | ApoE <sup>-/-</sup><br>(n=19) | IL-33 <sup>-/-</sup> ApoE <sup>-/-</sup><br>(n=28) | ST2 <sup>-/-</sup> ApoE <sup>-/-</sup><br>(n=9) | ApoE <sup>-/-</sup> , anti-<br>ST2 (n=9) | ApoE <sup>-/-</sup> , isotype<br>(n=10) |
|-------------|-------------------------------|----------------------------------------------------|-------------------------------------------------|------------------------------------------|-----------------------------------------|
| before diet | 26.33 $\pm$ 0.55              | 27.15 $\pm$ 0.47                                   | 27.17 $\pm$ 0.55                                | 25.88 $\pm$ 0.77                         | 26.03 $\pm$ 0.54                        |
| after diet  | 32.07 $\pm$ 0.52*             | 31.41 $\pm$ 0.55*                                  | 30.24 $\pm$ 0.78*                               | 29.75 $\pm$ 1.20*                        | 30.21 $\pm$ 0.77*                       |

**Supporting Information Table 2: Serum total cholesterol concentrations (mM) before and after cholesterol-rich diet.**

Values represent the mean  $\pm$  SEM. \* $p < 0.05$ , significantly different before and after feeding 10 weeks a cholesterol-rich diet as analyzed by paired two-tailed Student's t-test. §,  $p = 0.016$  vs. ApoE<sup>-/-</sup>, anti-ST2; #,  $p = 0.0032$  vs. ApoE<sup>-/-</sup>, anti-ST2 or  $p = 0.022$  vs. ApoE<sup>-/-</sup>, isotype; †,  $p = 0.032$  vs. ST2<sup>-/-</sup>ApoE<sup>-/-</sup>, one-way ANOVA and Tukey's post-test for pairwise comparison.

|             | ApoE <sup>-/-</sup><br>(n=20) | IL-33 <sup>-/-</sup> ApoE <sup>-/-</sup><br>(n=28) | ST2 <sup>-/-</sup> ApoE <sup>-/-</sup><br>(n=9) | ApoE <sup>-/-</sup> , anti-ST2<br>(n=9) | ApoE <sup>-/-</sup> , isotype<br>(n=10) |
|-------------|-------------------------------|----------------------------------------------------|-------------------------------------------------|-----------------------------------------|-----------------------------------------|
| before diet | 6.83 $\pm$ 0.31               | 6.23 $\pm$ 0.21 <sup>§</sup>                       | 5.59 $\pm$ 0.17 <sup>#</sup>                    | 7.69 $\pm$ 0.41                         | 7.29 $\pm$ 0.43                         |
| after diet  | 9.15 $\pm$ 0.45*              | 9.96 $\pm$ 0.67*, <sup>†</sup>                     | 6.76 $\pm$ 0.73                                 | 9.93 $\pm$ 0.82*                        | 10.33 $\pm$ 0.78*                       |
